# Supplementary material for: Metabolomic exploration of the effects of habituation to livestock trailer and extended transportation in goats
Source: Frontiers journal article supplement (doi:10.3389/fmolb.2022.1027069), 2022-11-17
Supplement: Data_Sheet_1.PDF [file Data_Sheet_1.PDF]

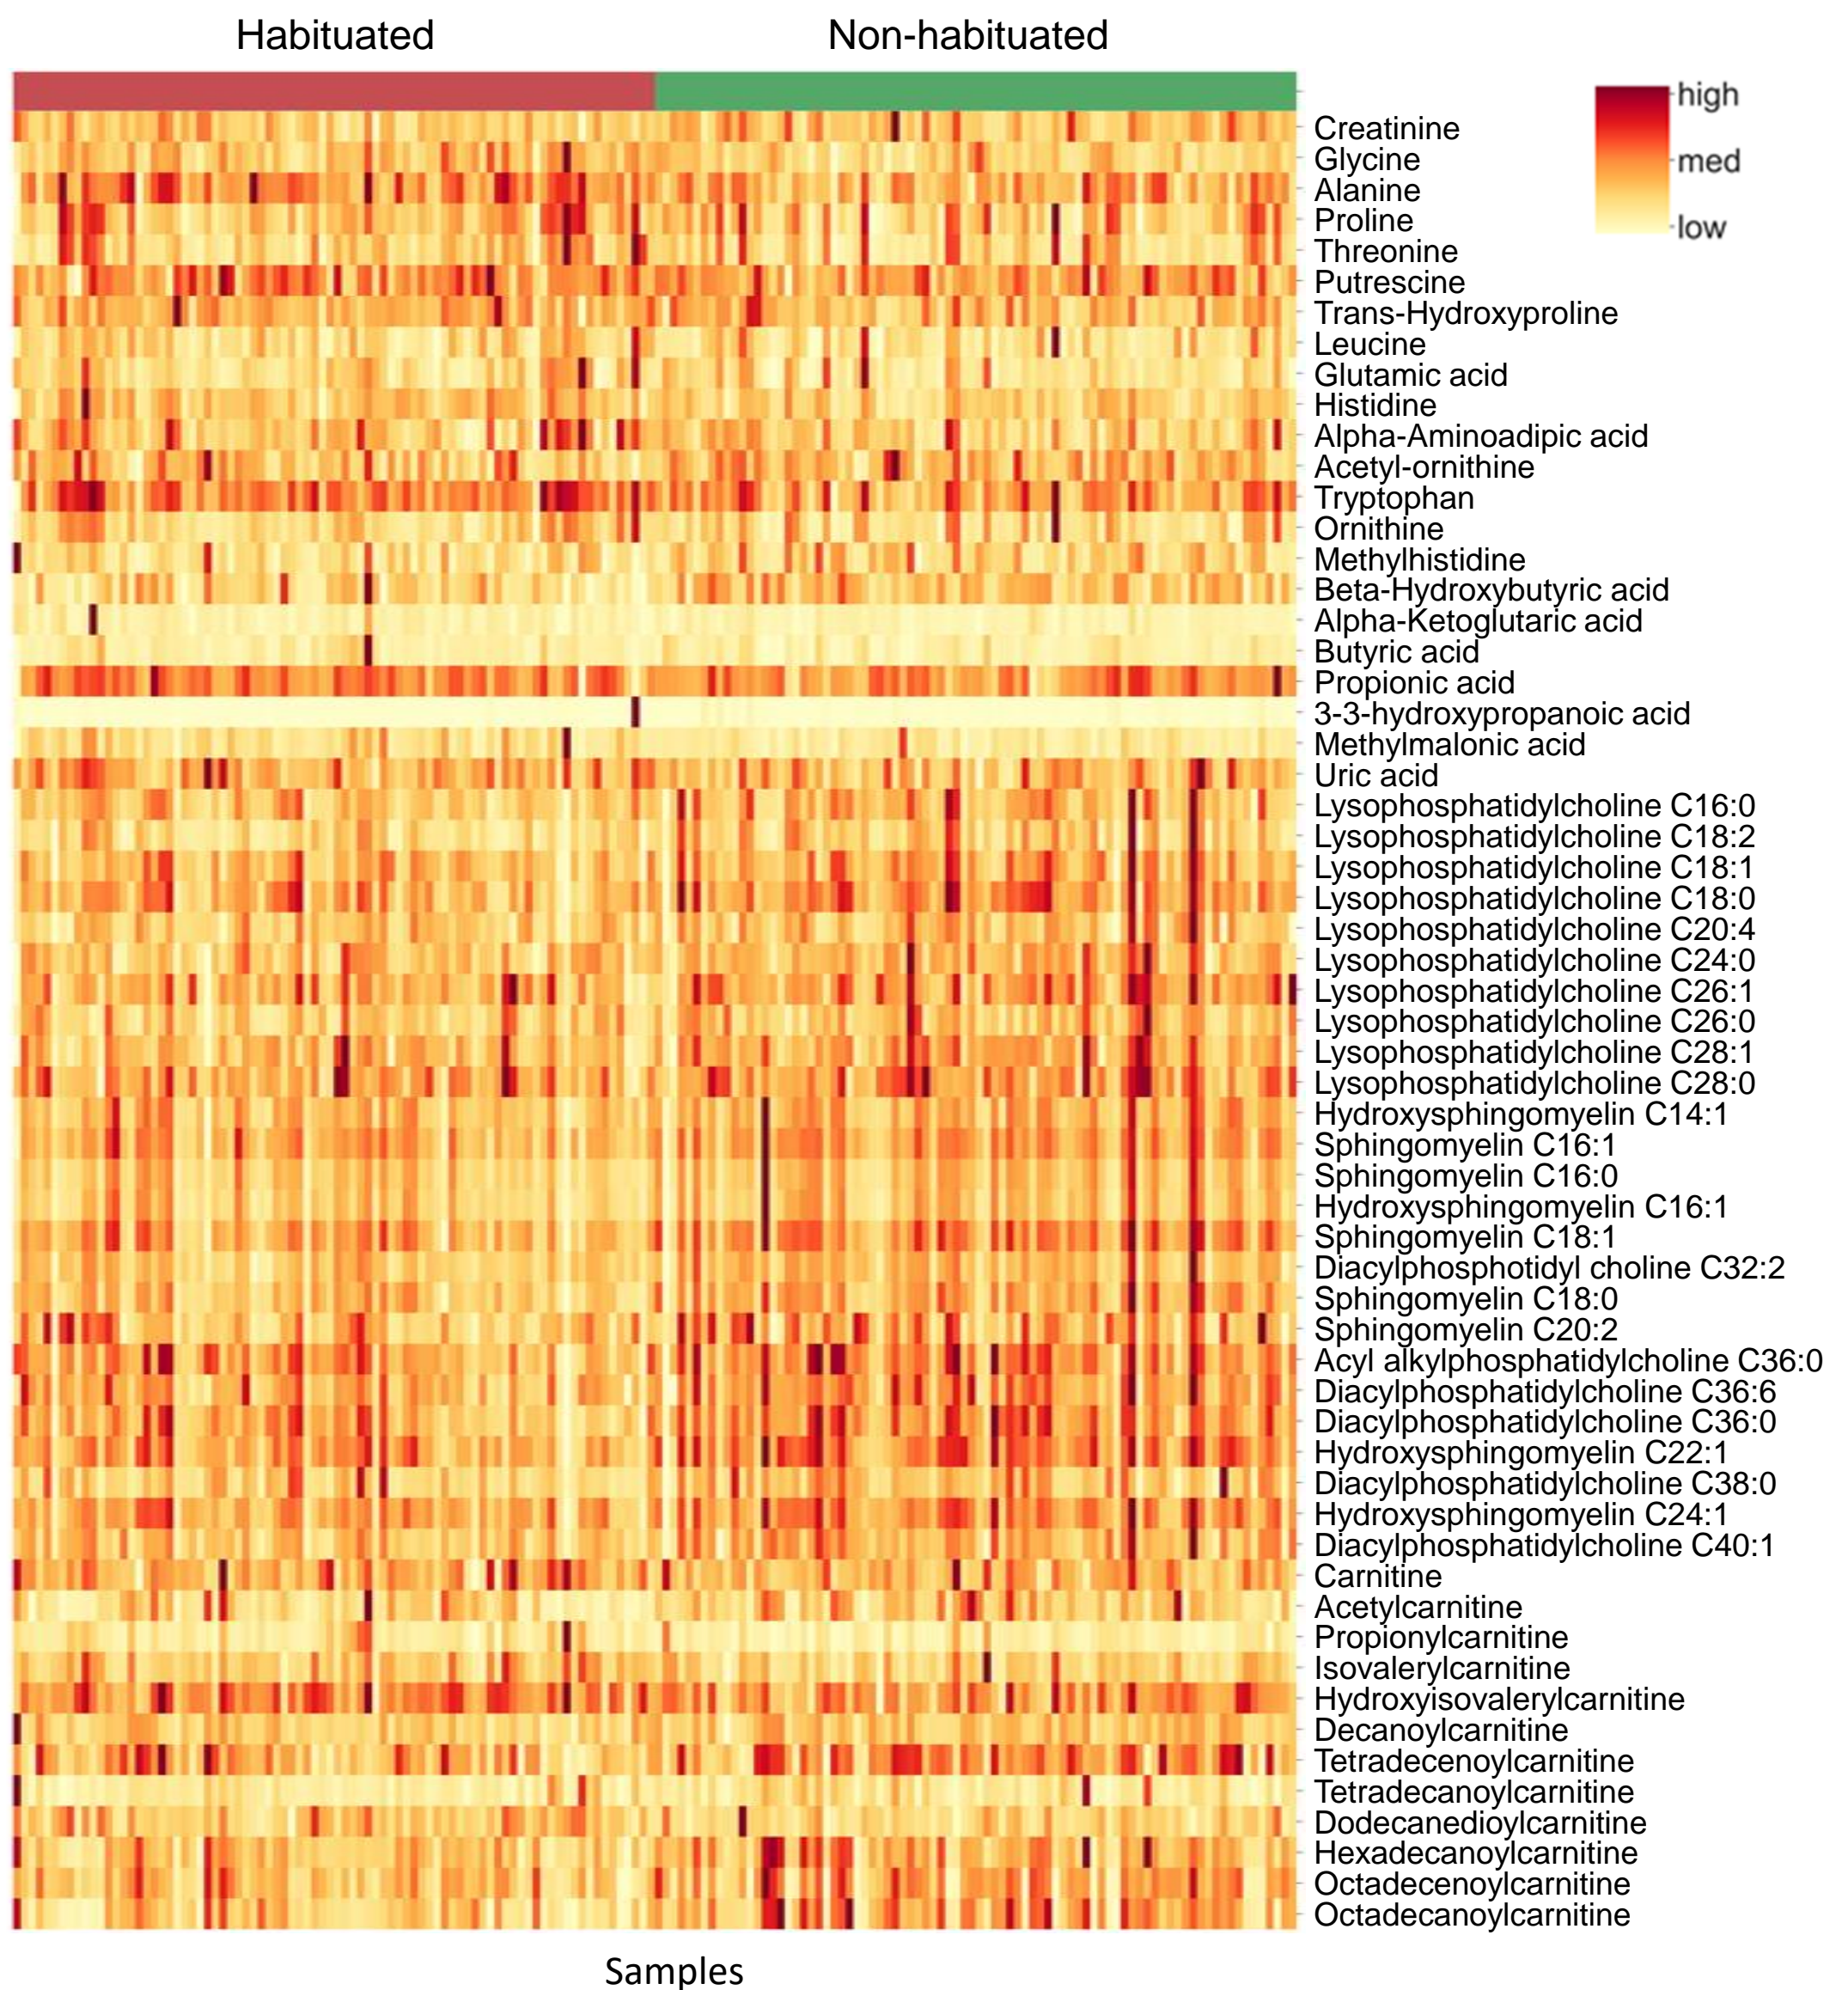

**SUPPLEMENTARY FIGURE 1.** Heat map of significantly affected plasma metabolites clustered by treatment (H = Habituated; NH = Non-habituated;  $P < 0.05$ )



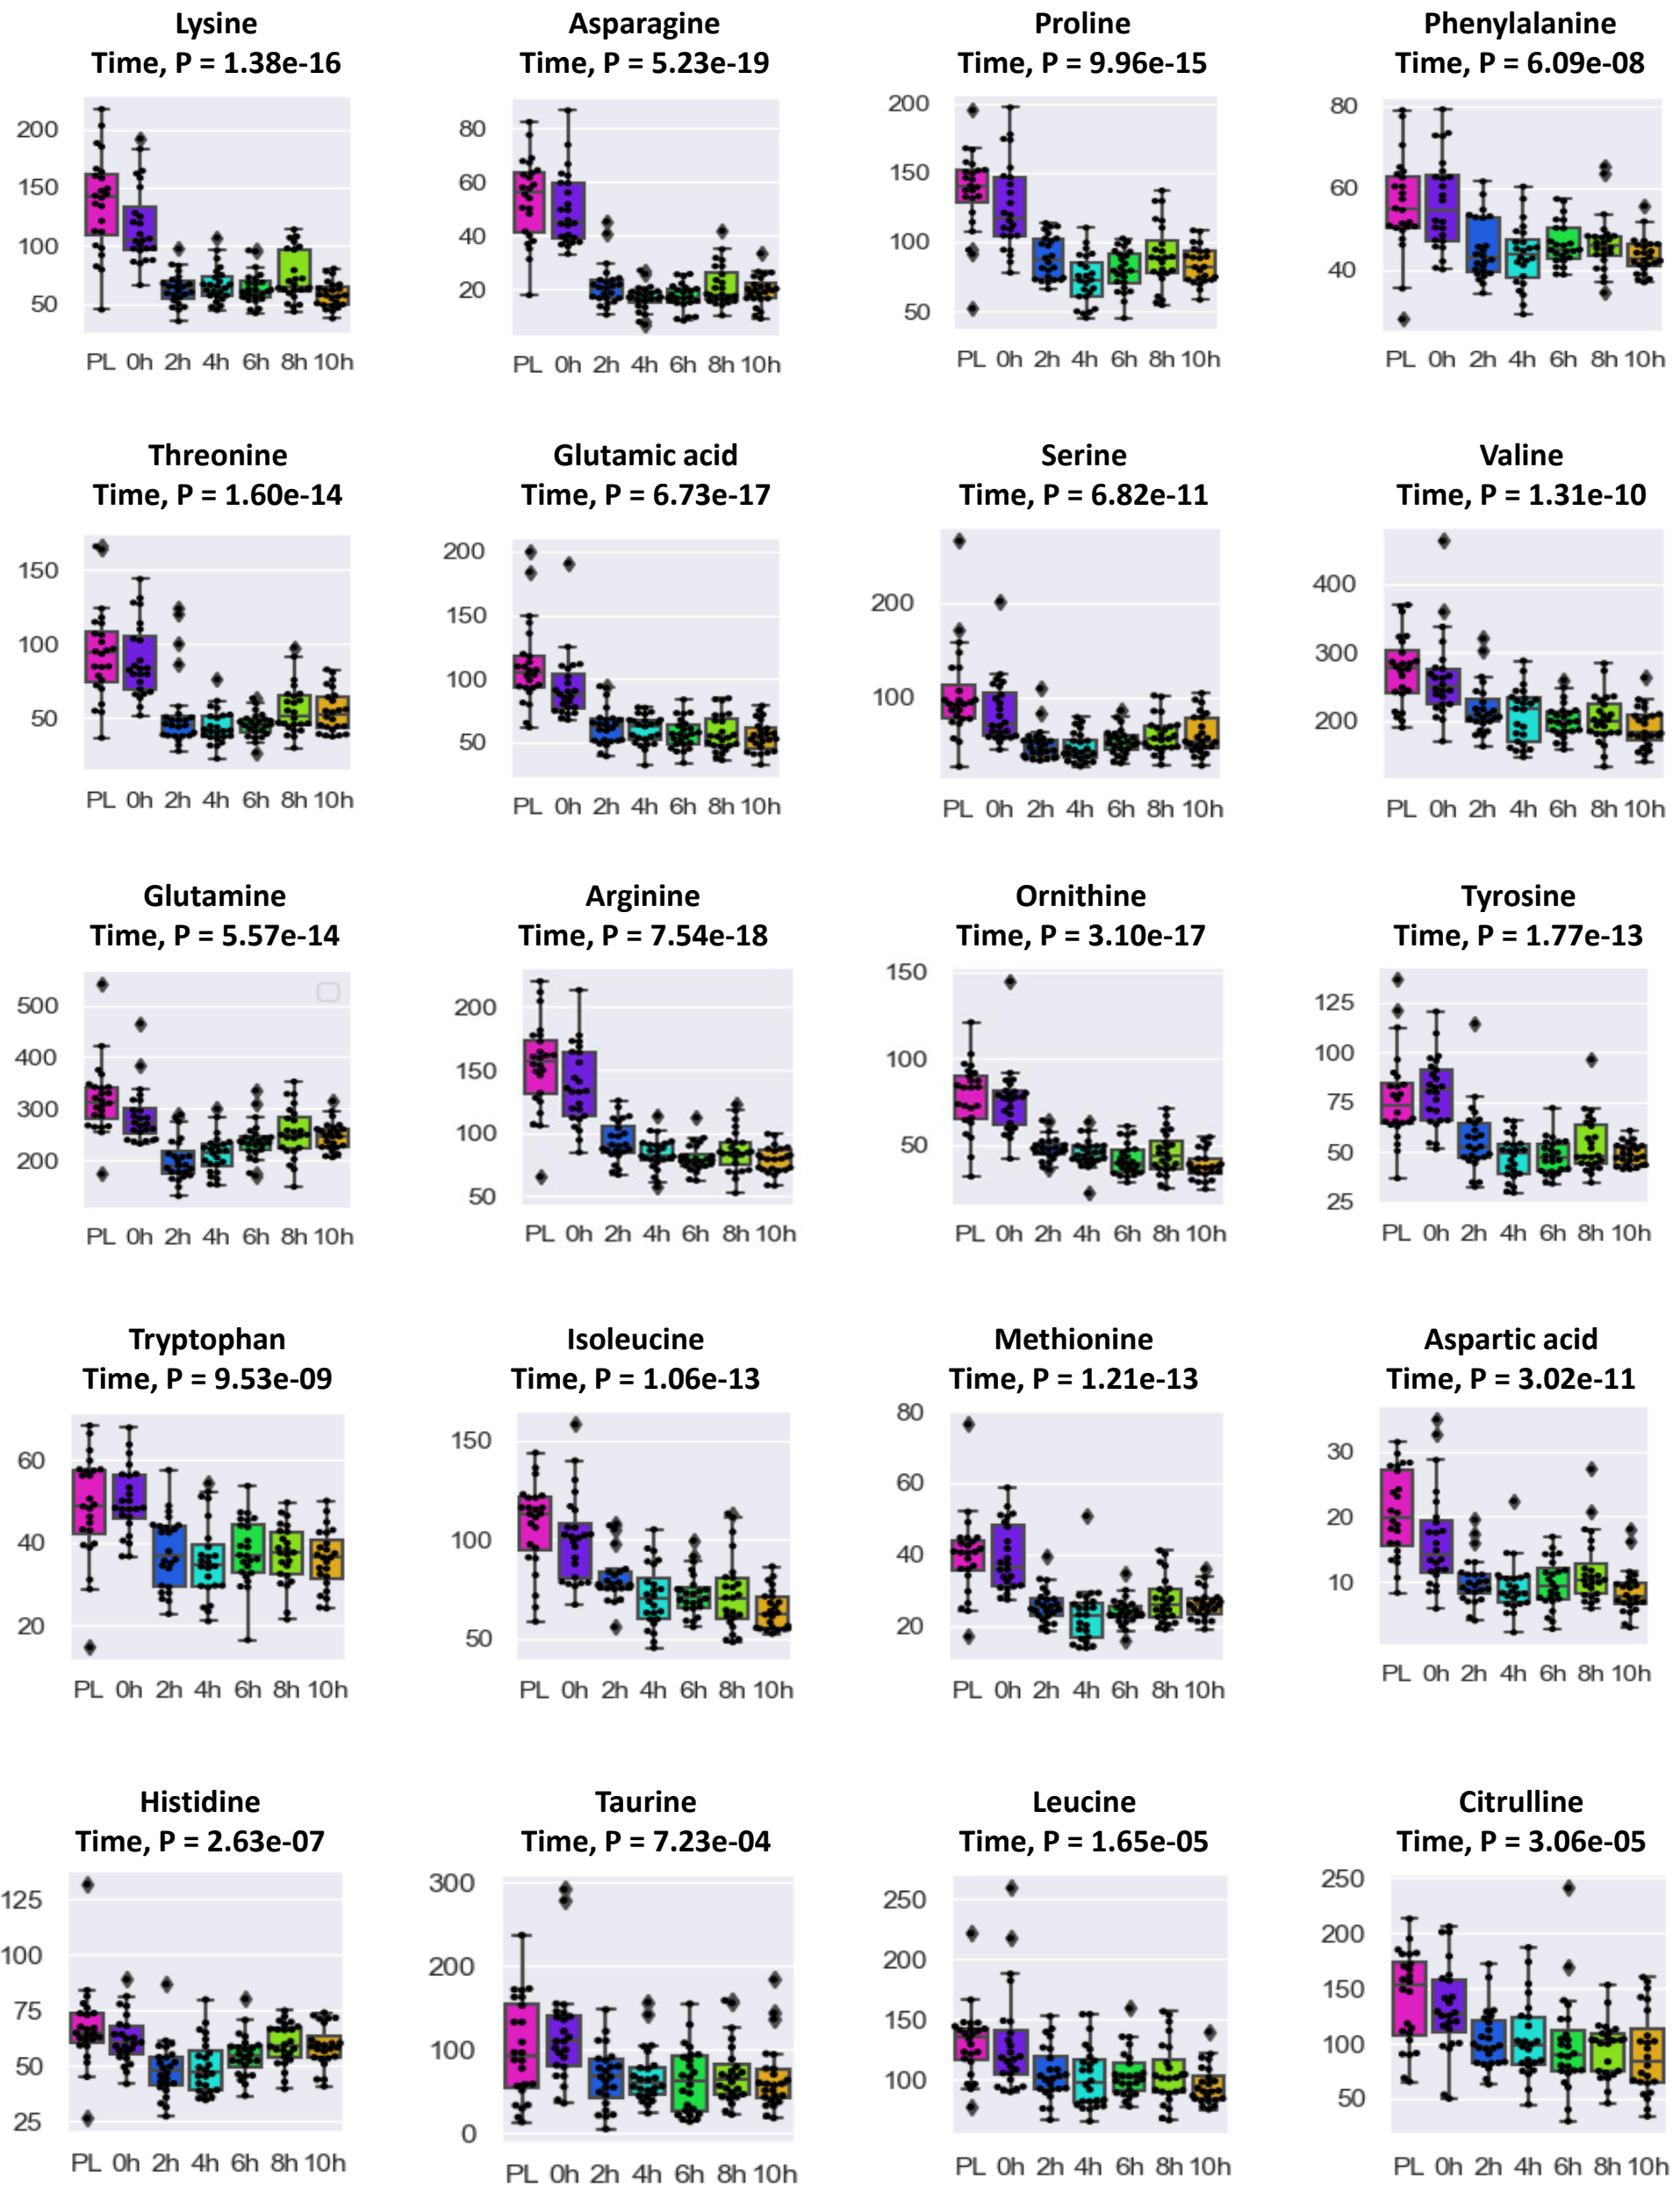

**SUPPLEMENTARY FIGURE 2.** Plots of amino acid concentrations ( $\mu\text{M}$ ) in goats significantly ( $P < 0.05$ ) affected by transportation time (Time main effect,  $P < 0.05$ ; PL = pre-load concentrations).

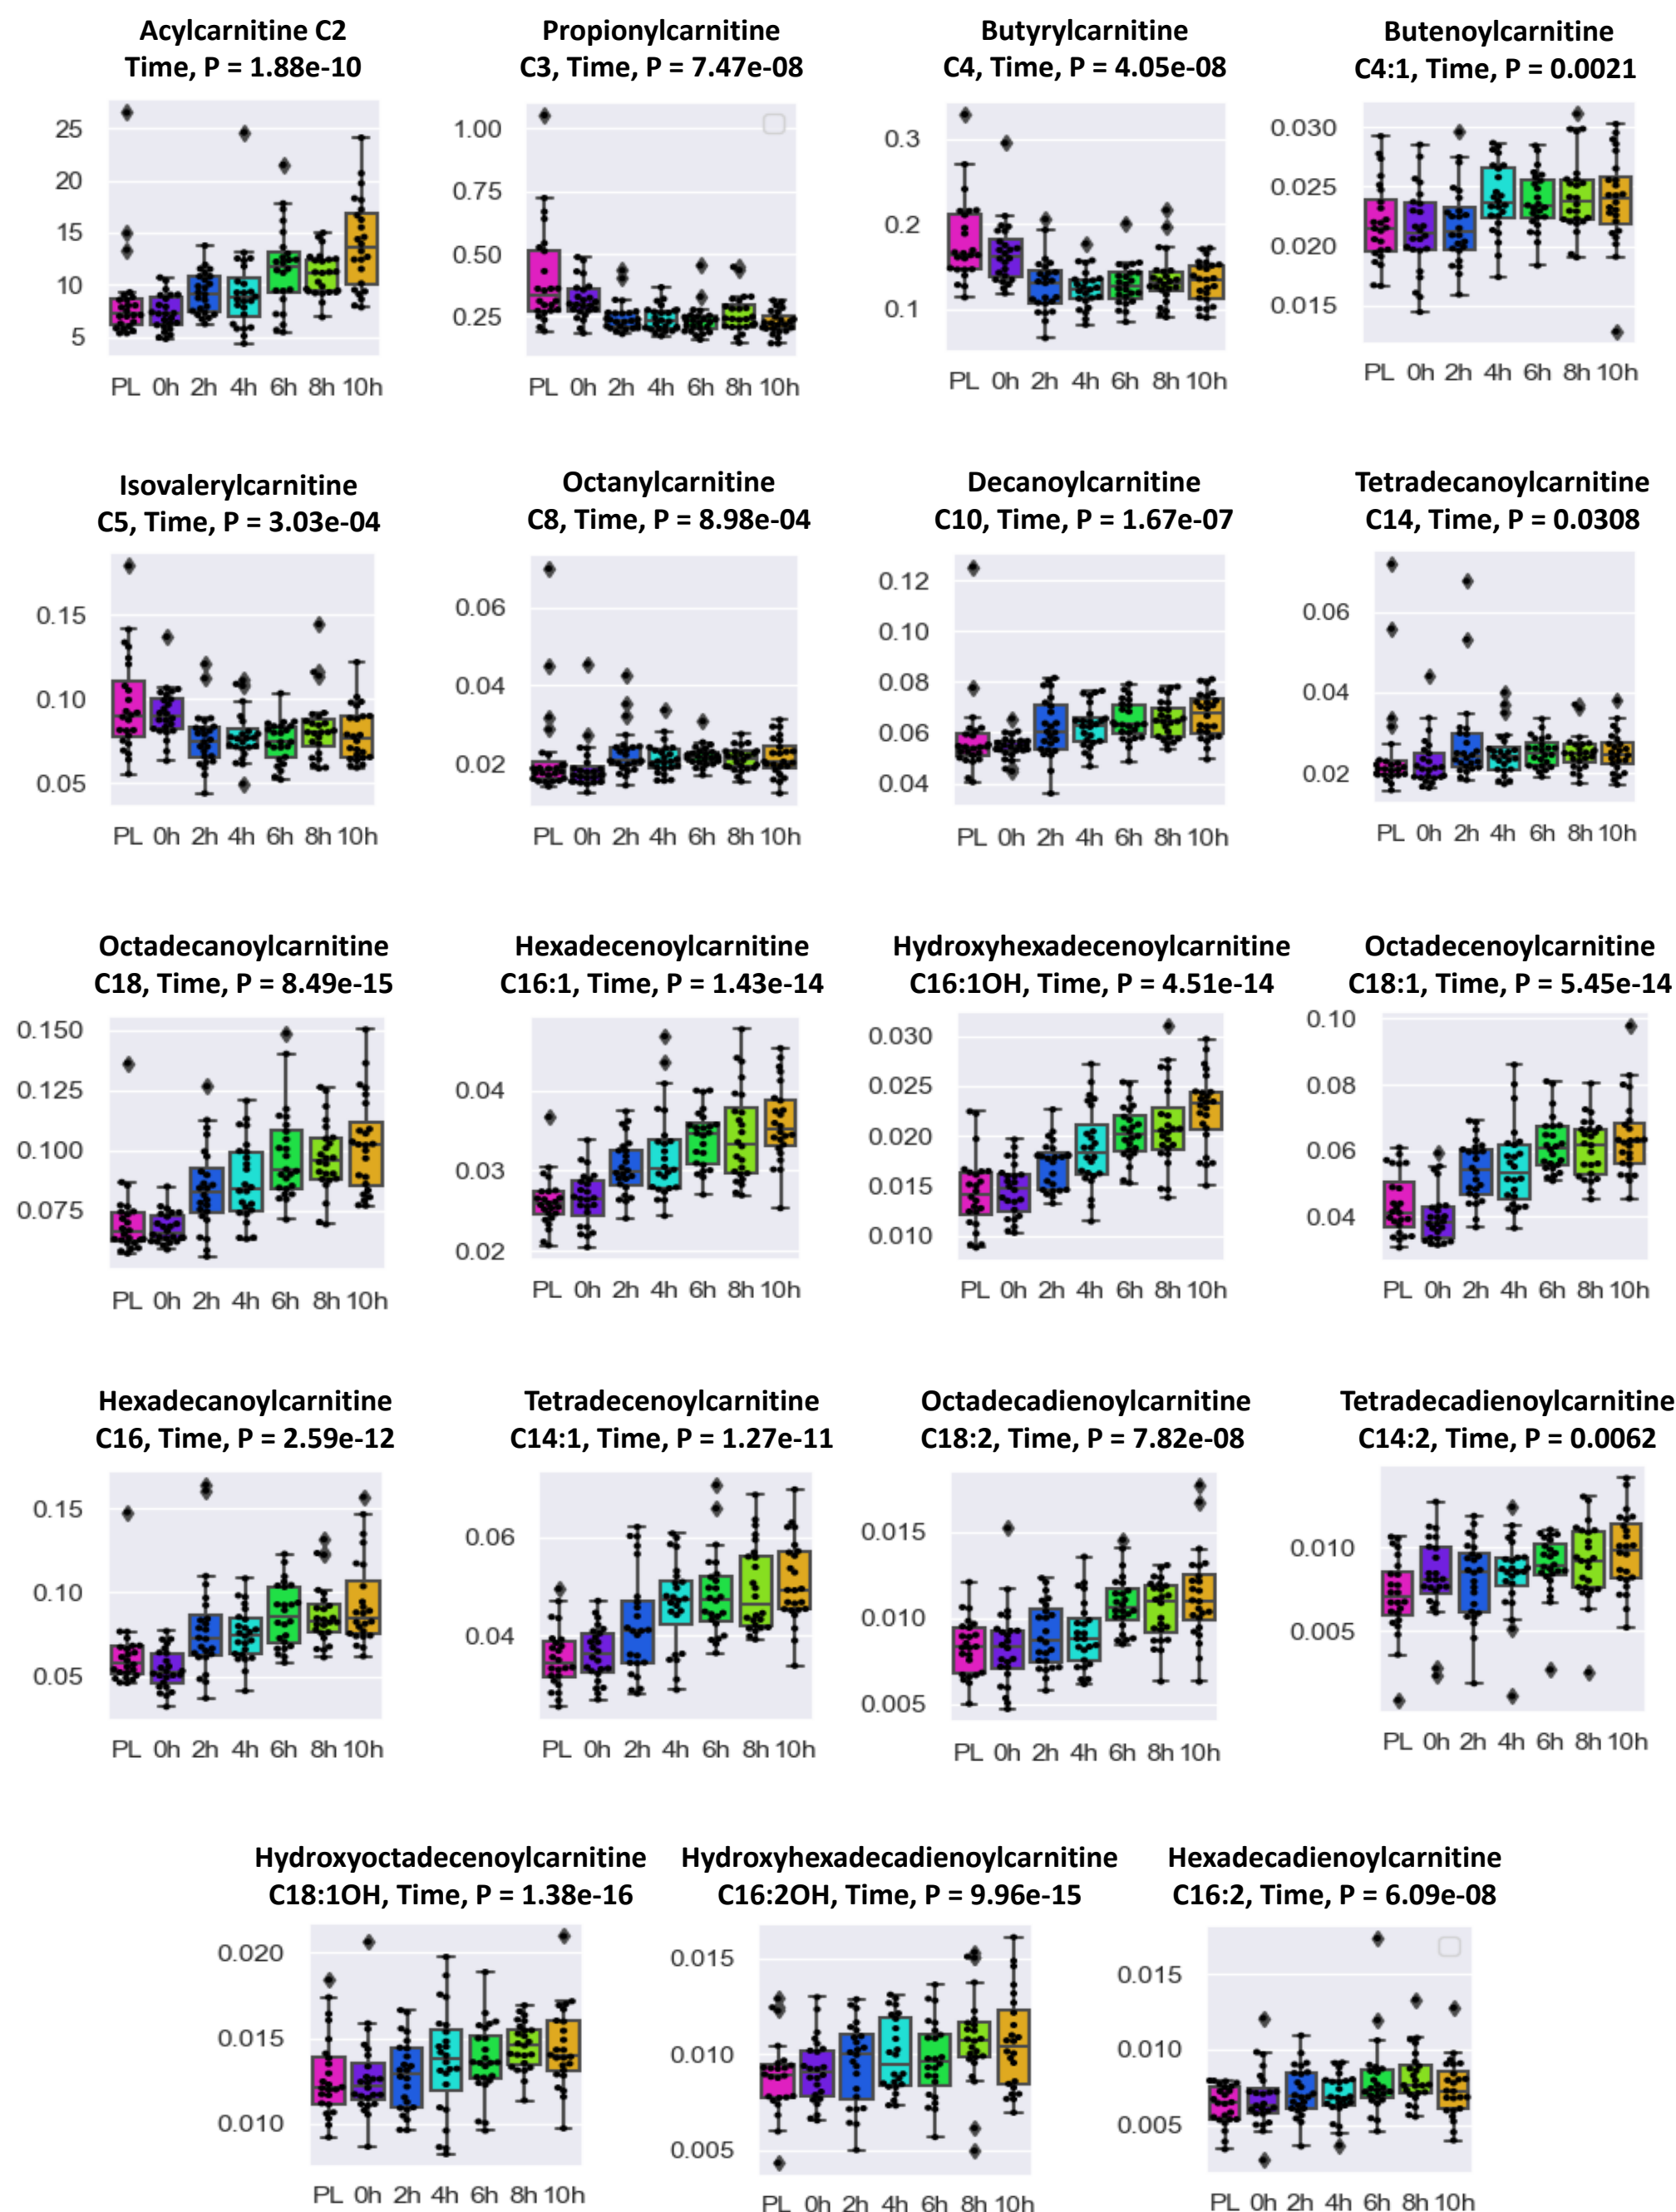

**SUPPLEMENTARY FIGURE 3.** Plots of acylcarnitine concentrations ( $\mu\text{M}$ ) in goats significantly ( $P < 0.05$ ) affected by transportation time (Time main effect,  $P < 0.05$ ; PL = pre-load concentrations).

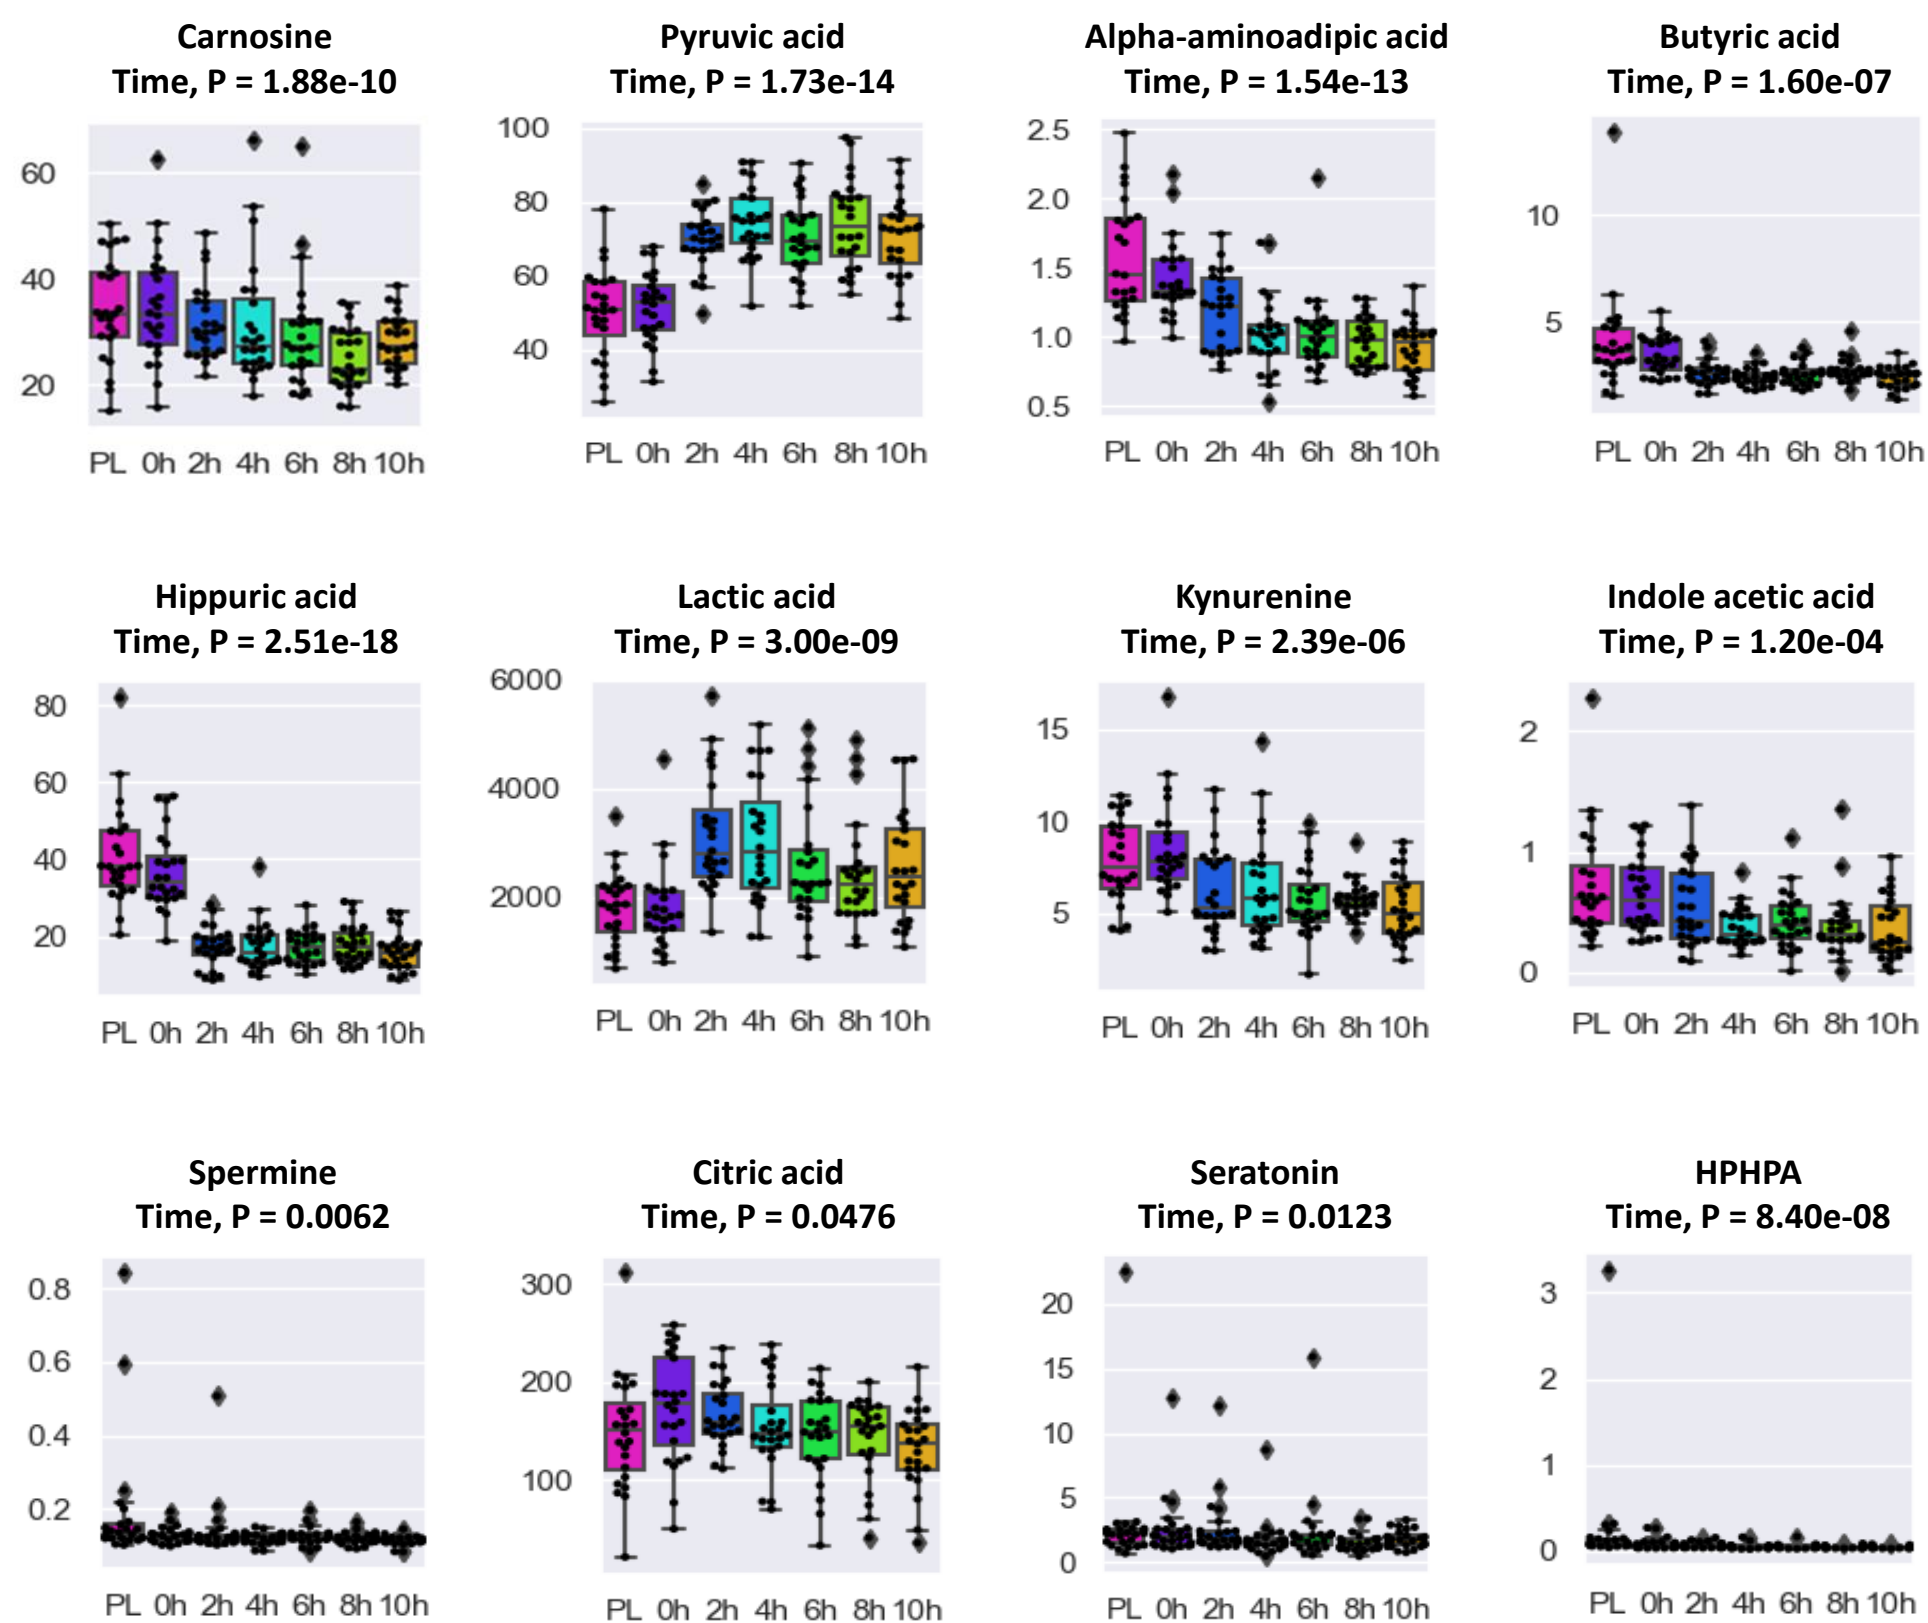

**SUPPLEMENTARY FIGURE 4.** Plots of metabolite concentrations ( $\mu\text{M}$ ) in goats significantly ( $P < 0.05$ ) affected by transportation time (Time main effect,  $P < 0.05$ ; PL = pre-load concentrations).



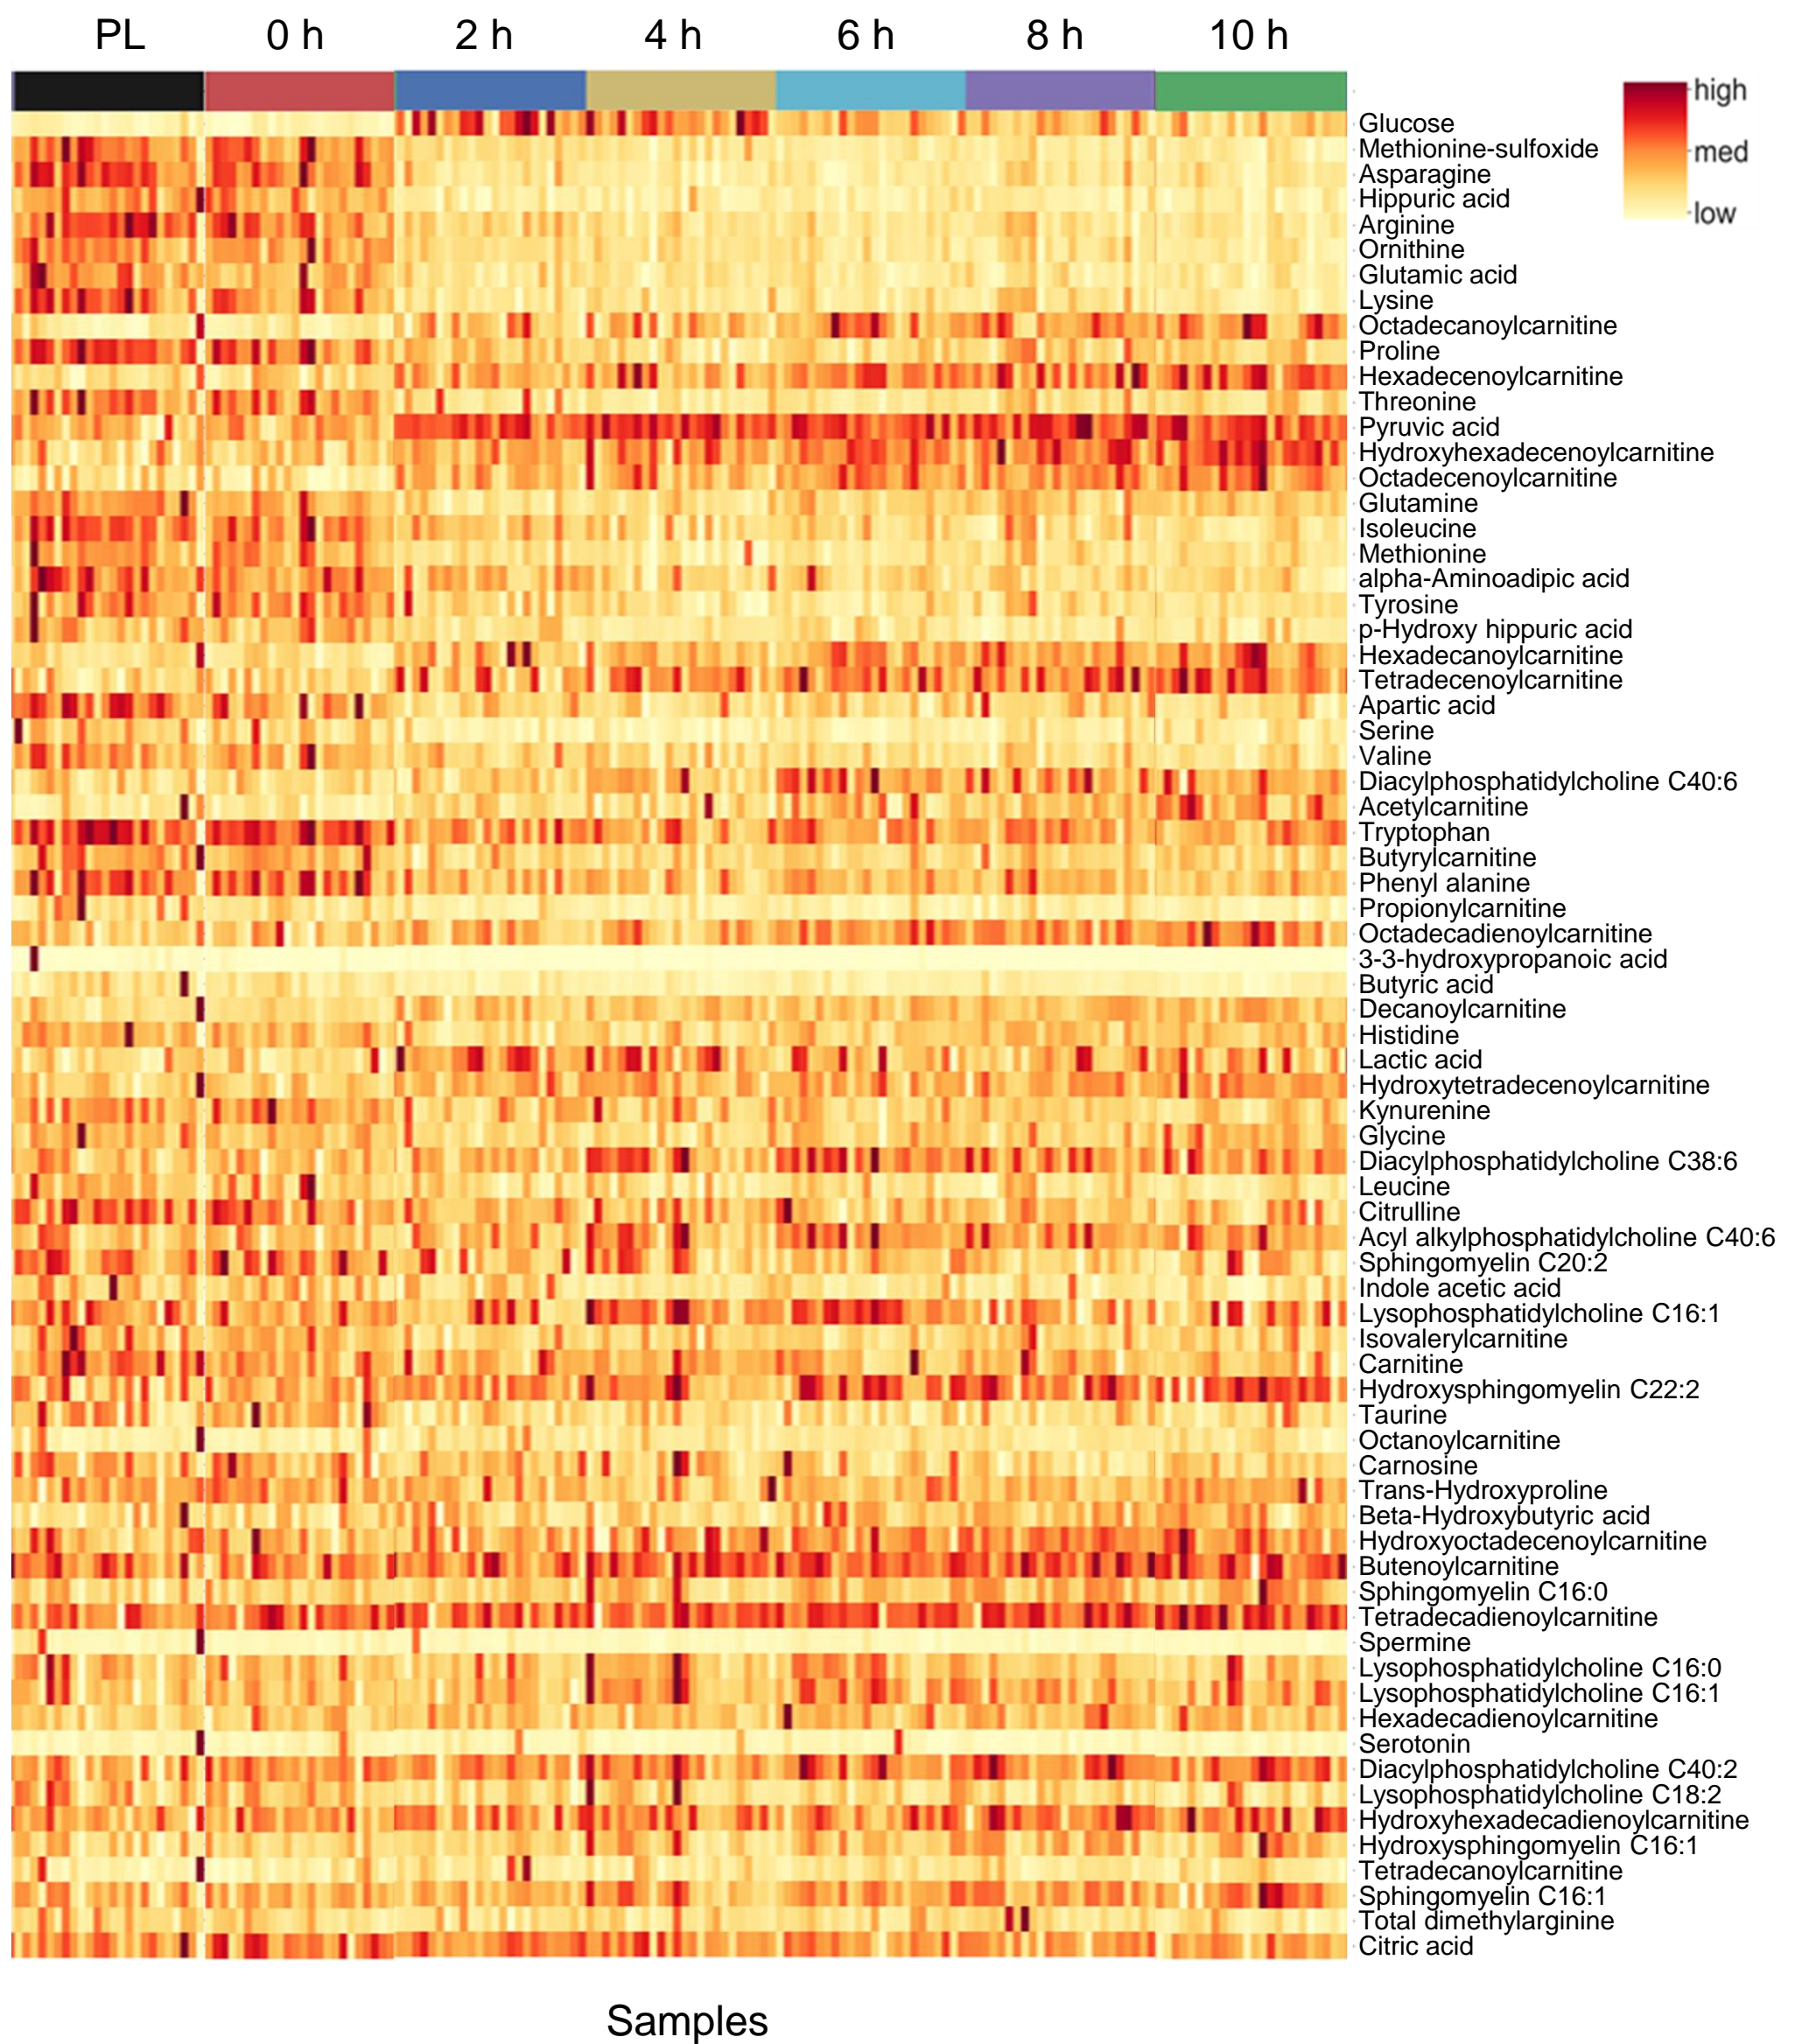

**SUPPLEMENTARY FIGURE 5.** Heat map of significantly affected plasma metabolites clustered by transportation time (Time;  $P < 0.05$ ).
